# Supplementary figures and images for: Co-targeting TMEM16A with a novel monoclonal antibody and EGFR with Cetuximab inhibits the growth and metastasis of esophageal squamous cell carcinoma
Source: PubMed Central journal article supplement — J Transl Med. 2024 Nov 20;22:1046. doi: 10.1186/s12967-024-05830-3 (PMC11577806; doi:10.1186/s12967-024-05830-3), 2024-11-20

Fig.S1

A

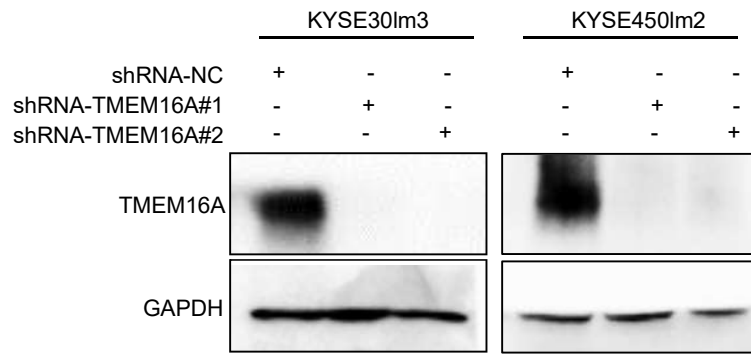

B

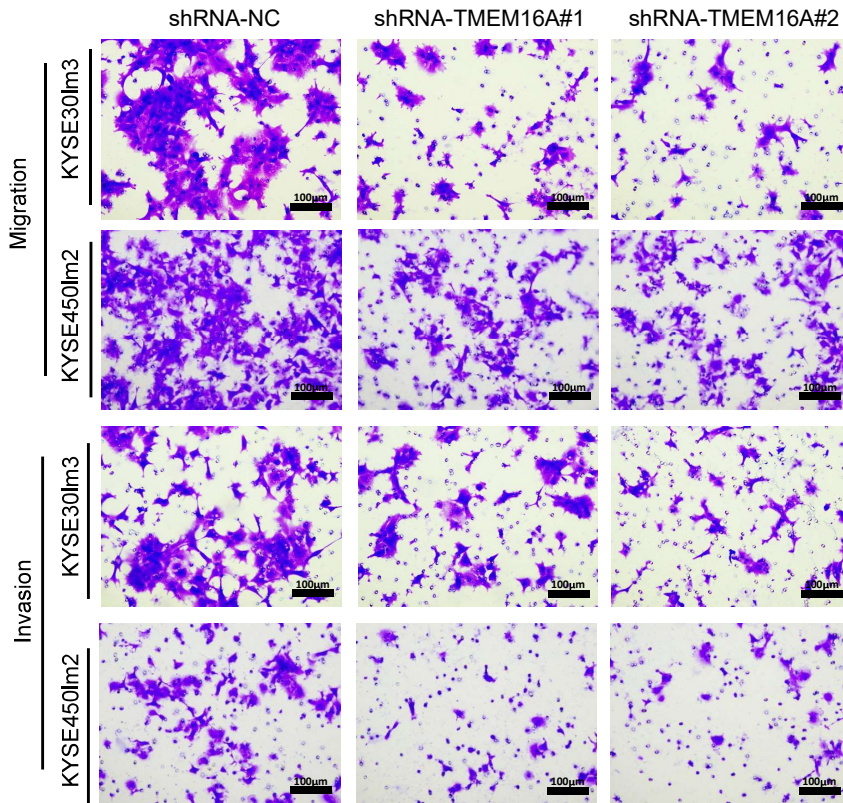

E

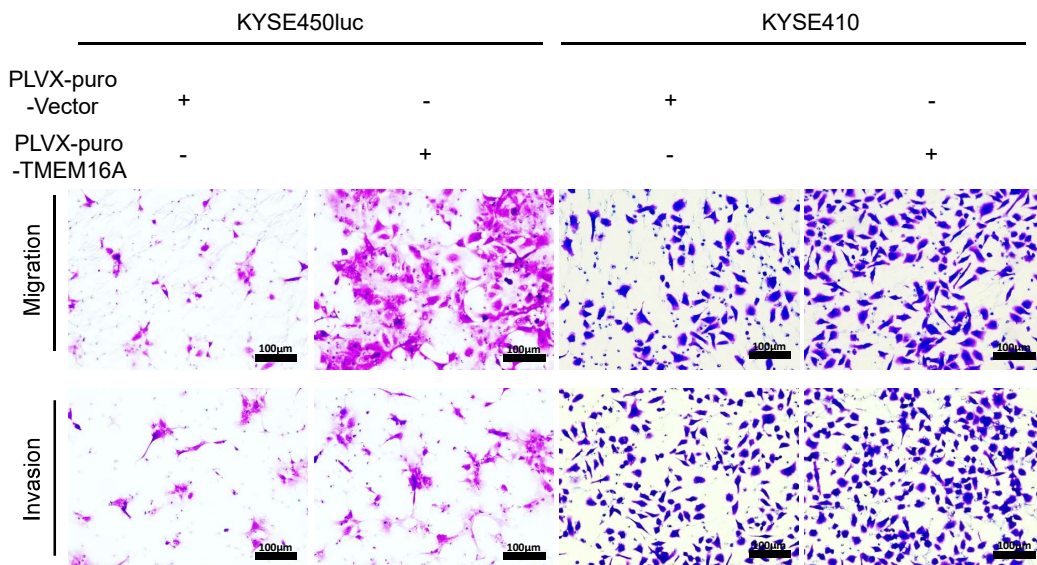

C

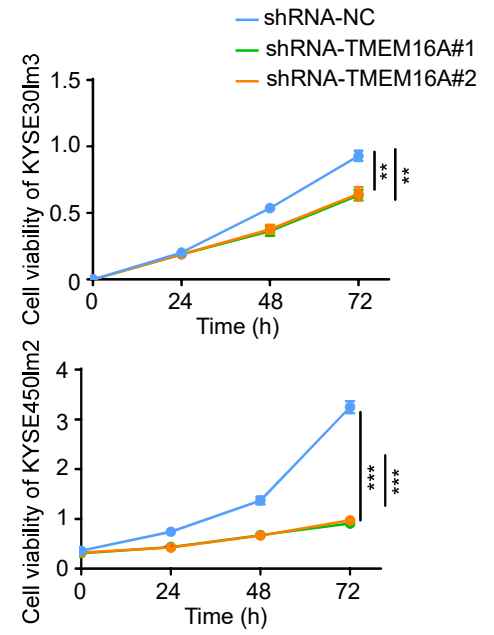

D

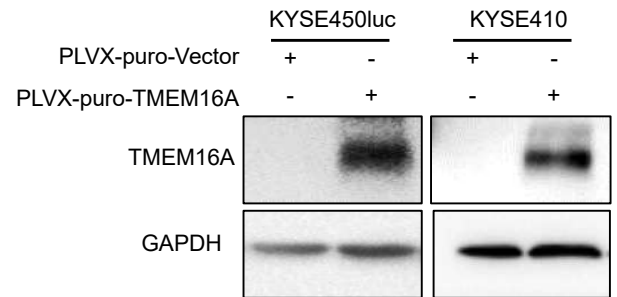

F

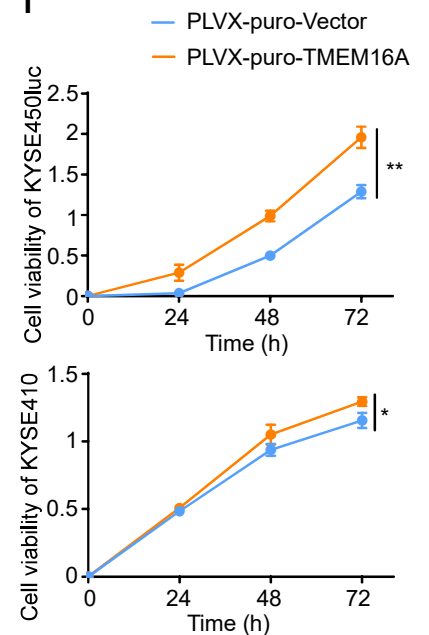

**Fig.S2**

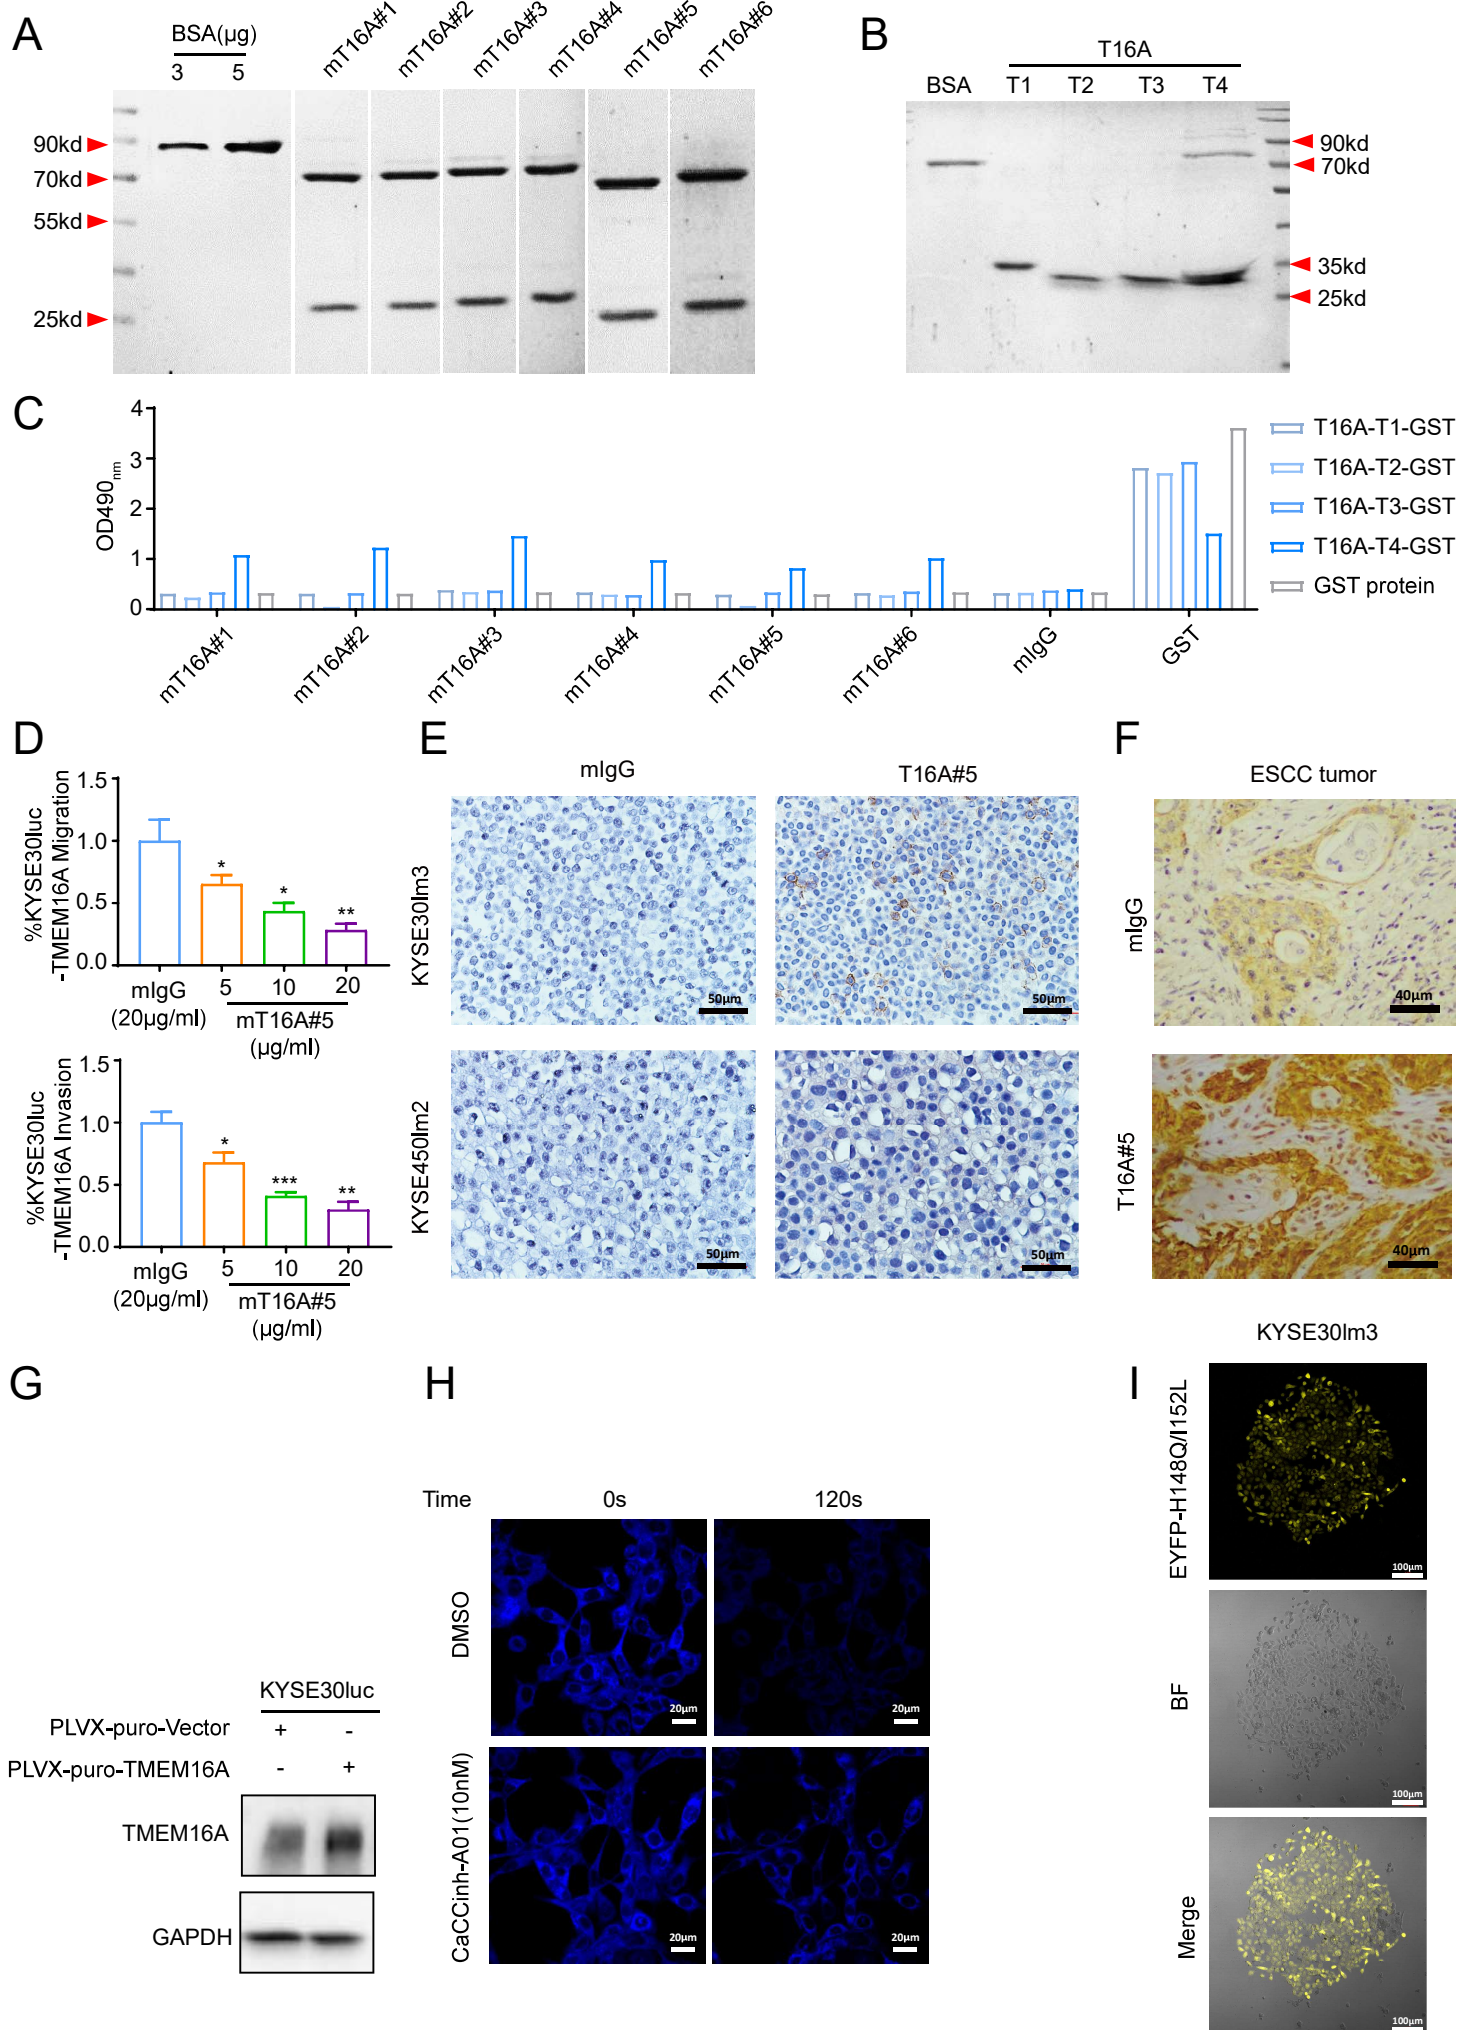

Fig.S3

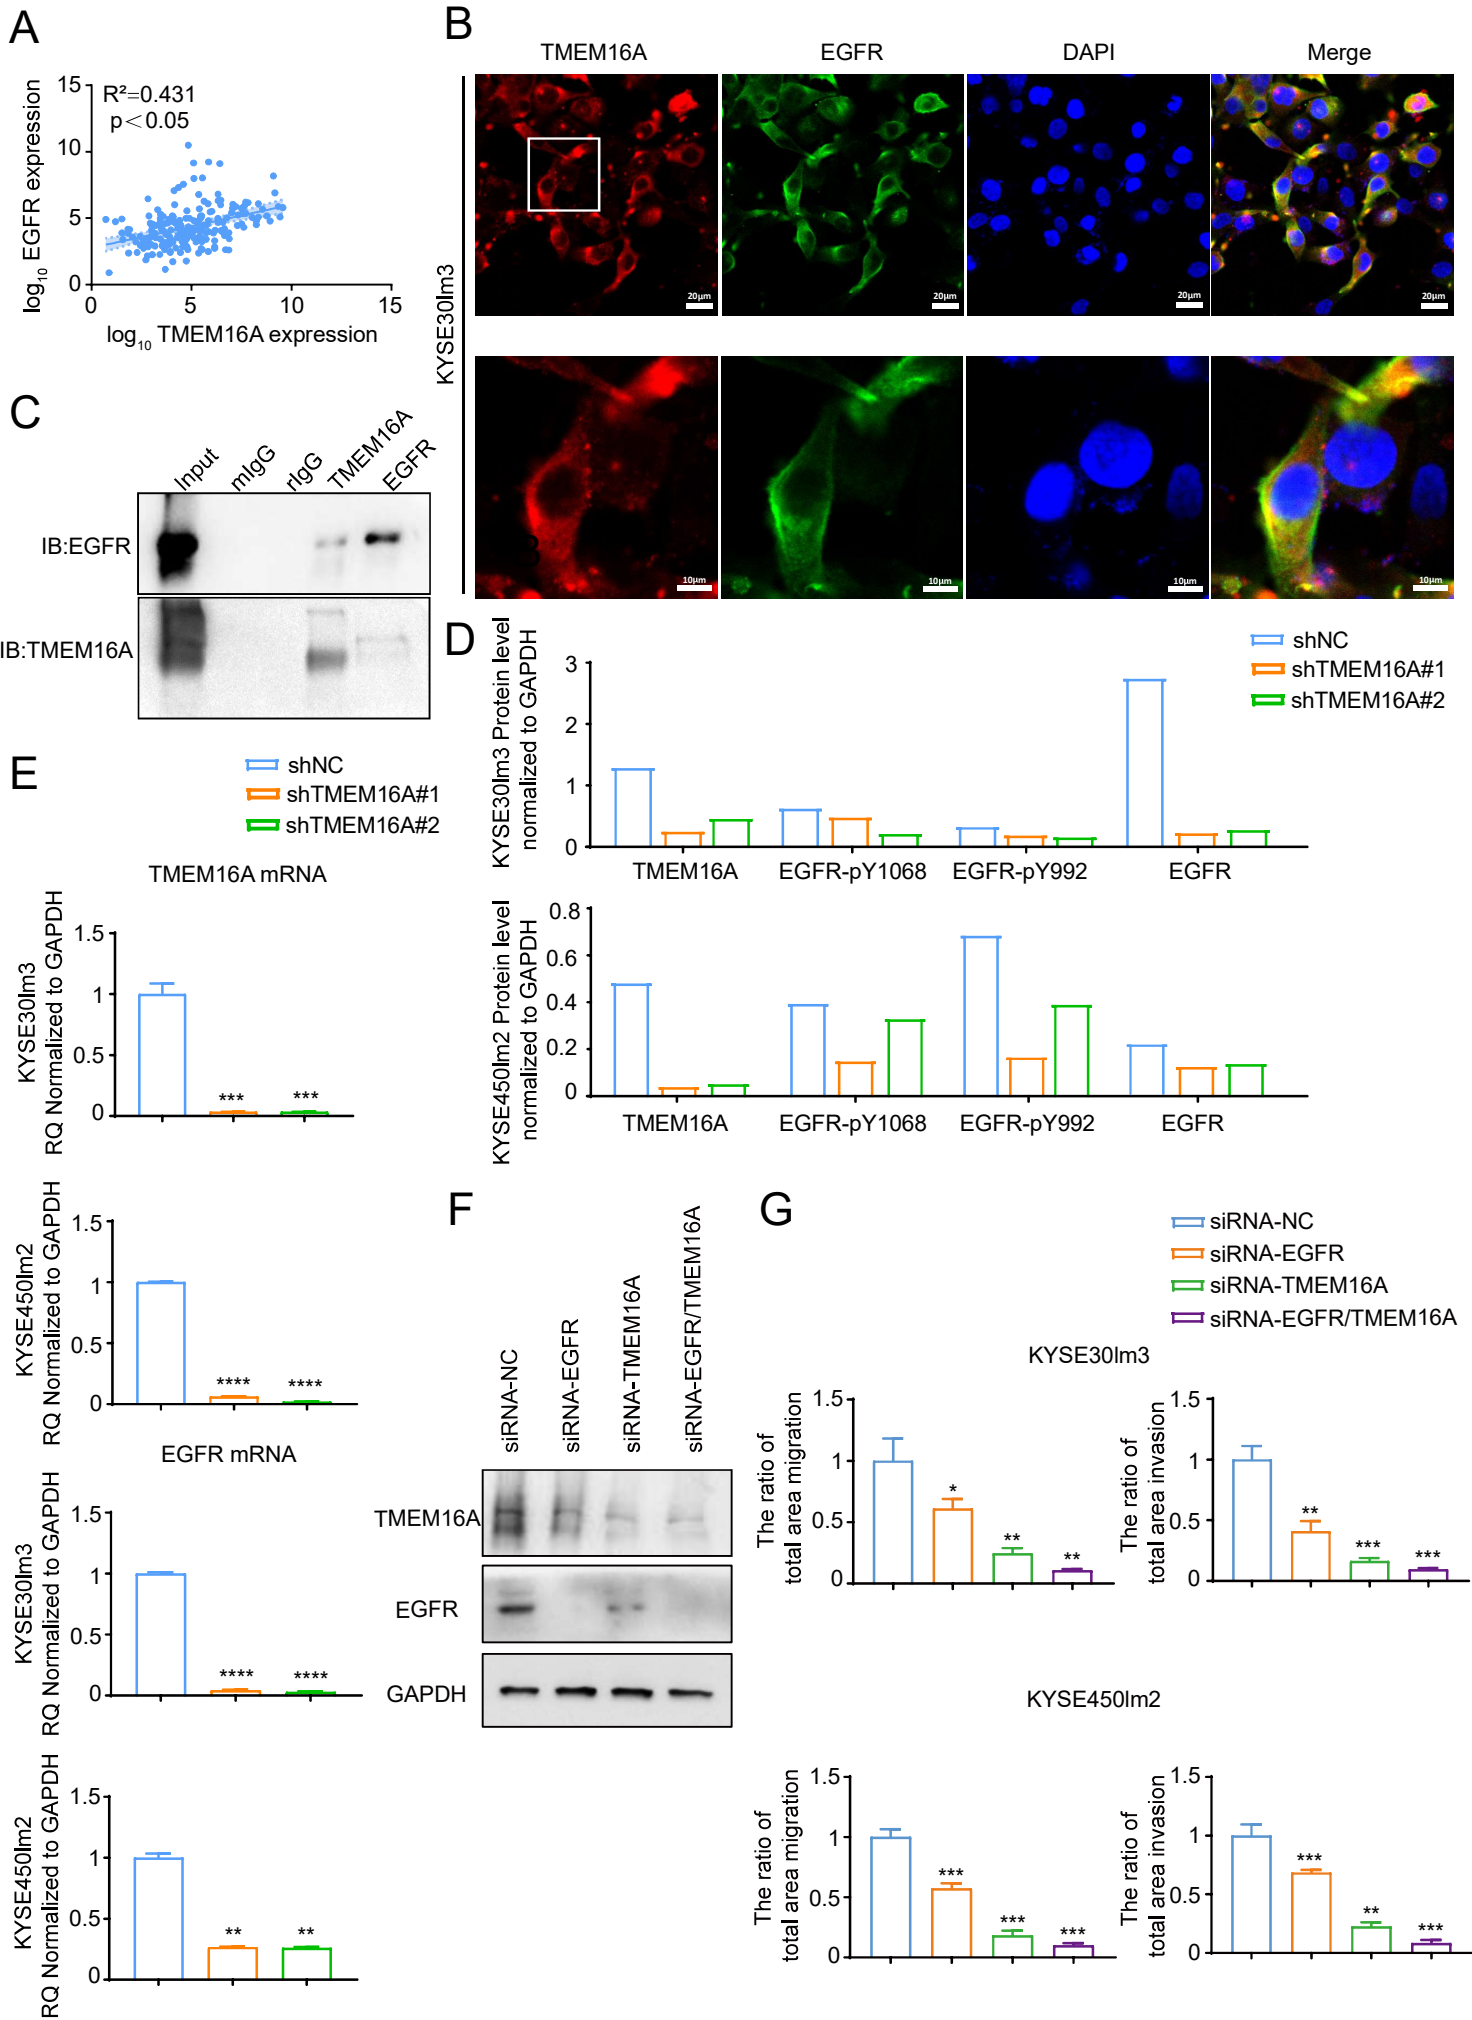

Fig.S4

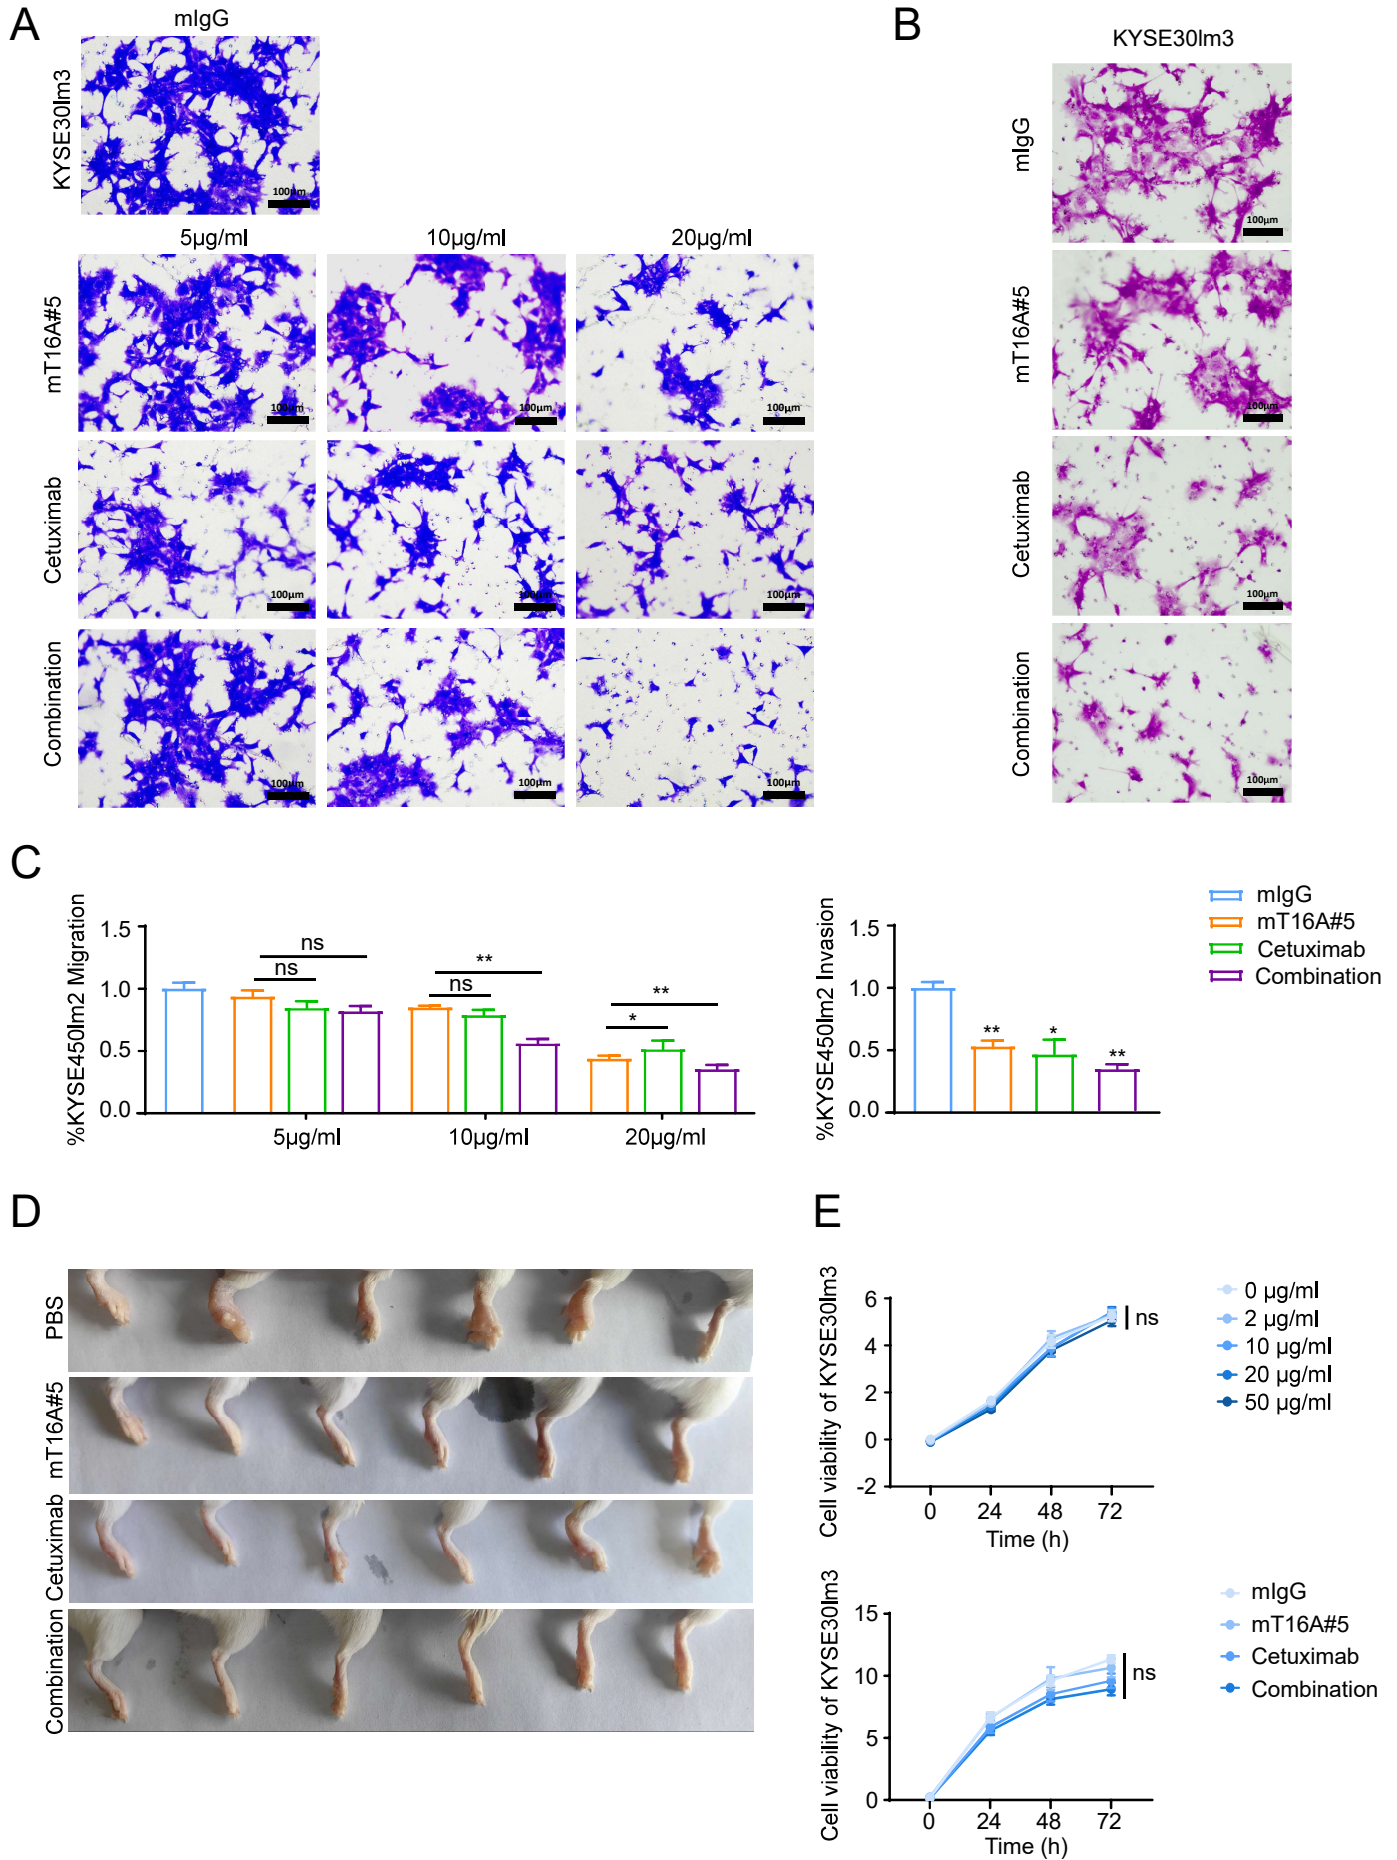

**Fig.S5**

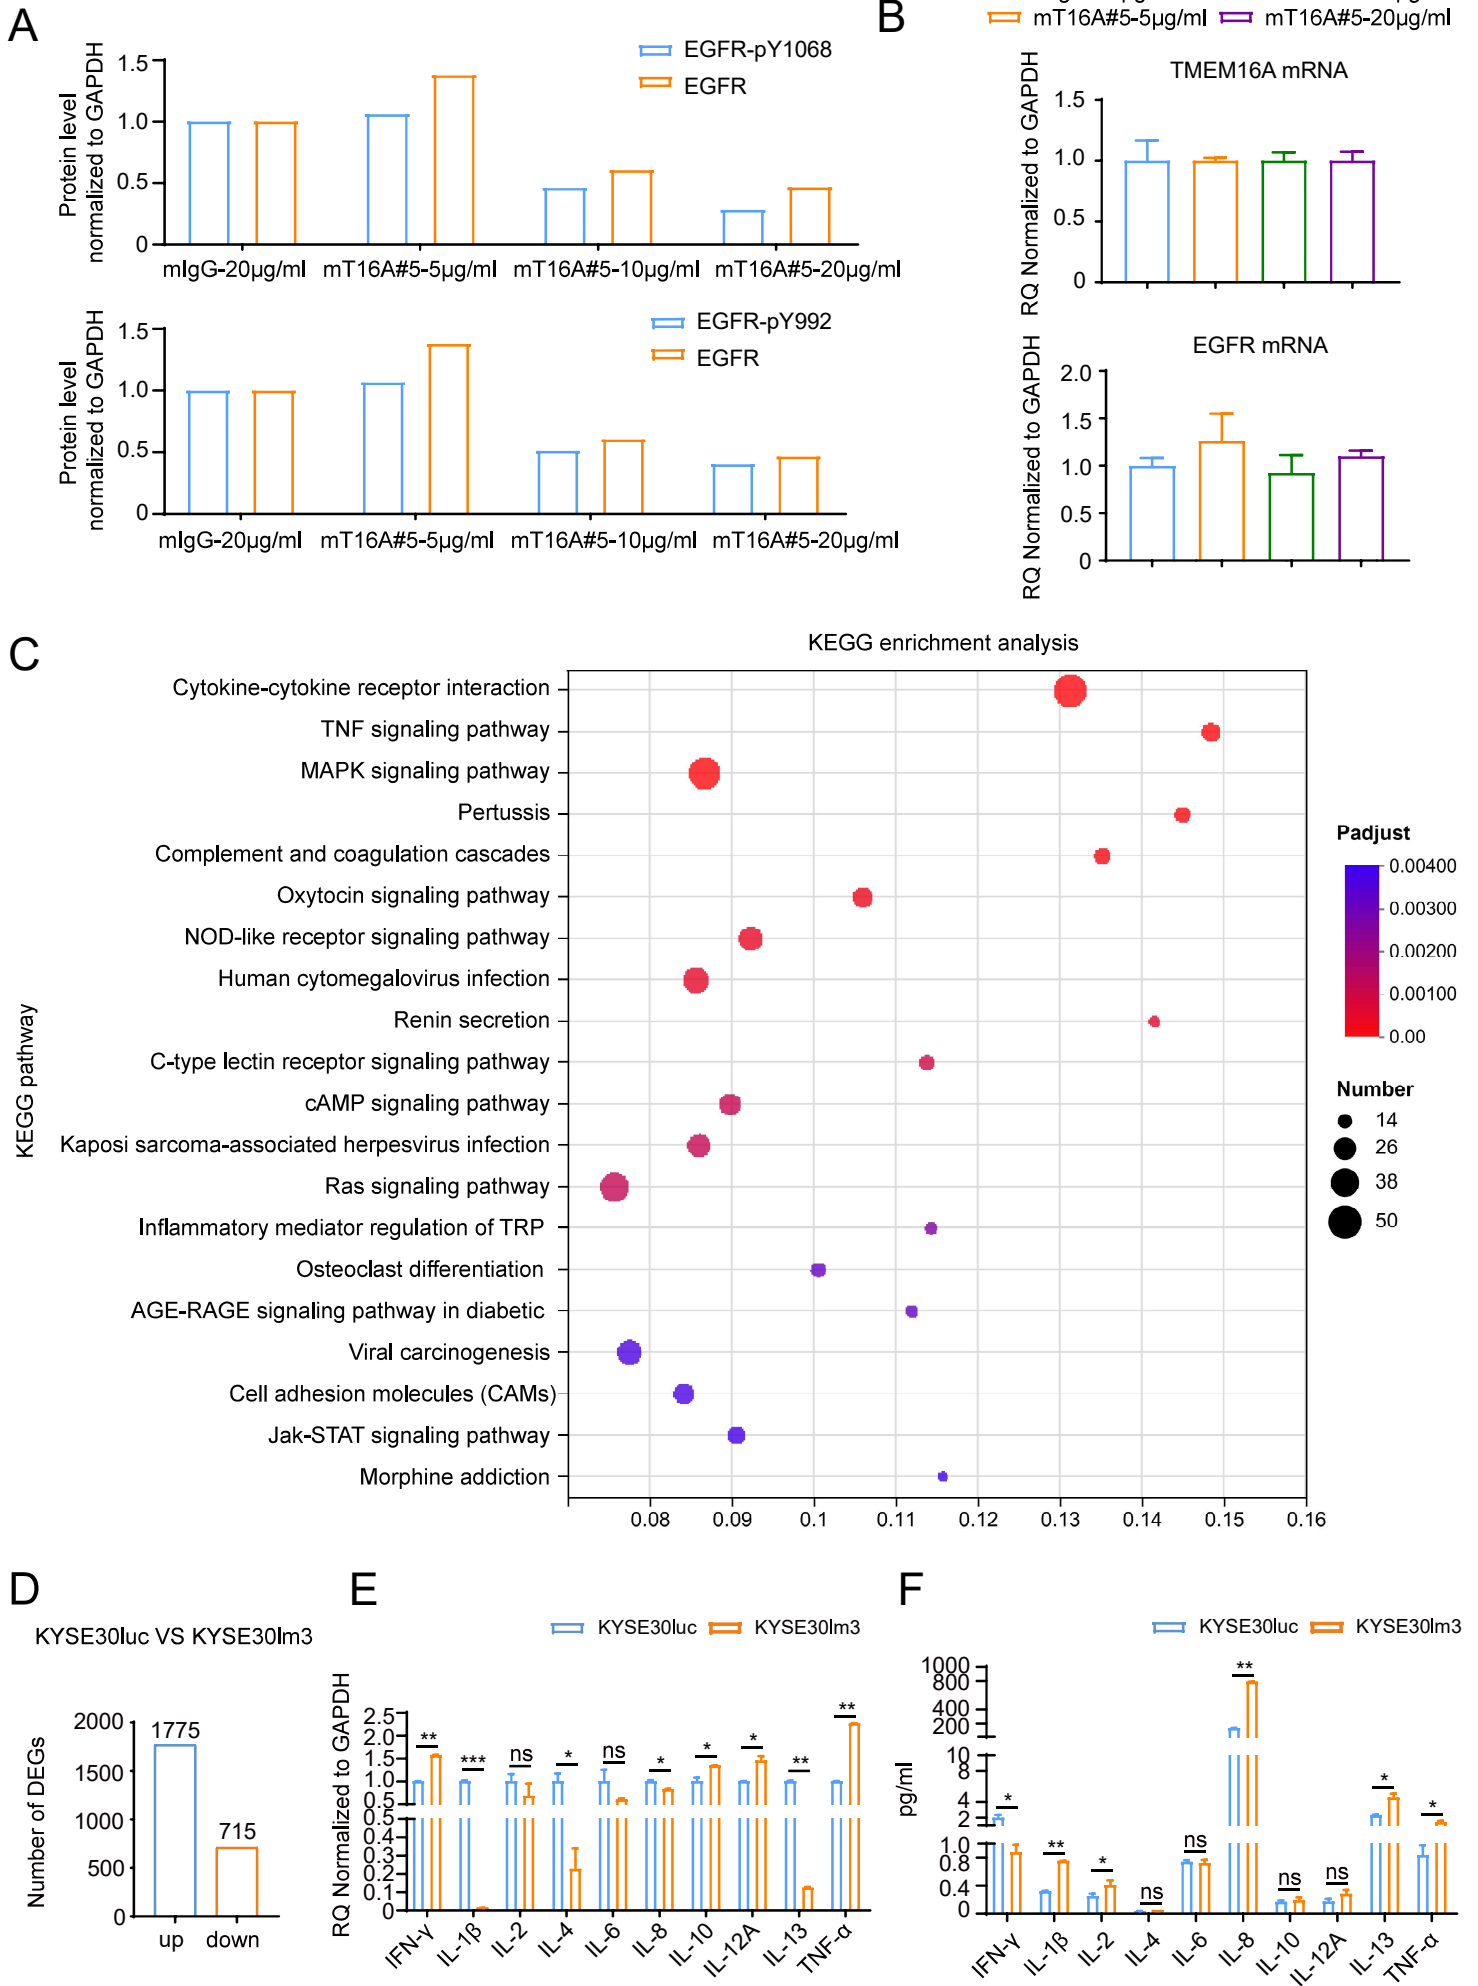

Supplement: 12967_2024_5830_MOESM1_ESM.pdf [file 12967_2024_5830_MOESM1_ESM.pdf]
